# Supplementary material for: Direct covalent bond formation between materials using copper(i)-catalyzed azide alkyne cycloaddition reactions
Source: Royal Society of Chemistry journal article supplement (doi:10.1039/c5ra08553e), 2015-01-01
Supplement: c5ra08553e1.pdf [file c5ra08553e1.pdf]

- Supporting Information -

Direct Covalent Bond Formation between  
Materials Using Copper(I)-Catalyzed Azide  
Alkyne Cycloaddition Reactions

*Tomoko Sekine, Yoshinori Takashima, Akira Harada\**

Department of Macromolecular Science, Graduate School of Science, Osaka University,

Toyonaka, Osaka 560-0043, Japan.

[harada@chem.sci.osaka-u.ac.jp](mailto:harada@chem.sci.osaka-u.ac.jp)

**\* Corresponding author. Telephone +81-6-6850-5445; Fax +81-6-6850-5445**

## Page contents

|    |                                                                                                            |         |
|----|------------------------------------------------------------------------------------------------------------|---------|
| 1. | Preparation of the Az-gel( $x$ )                                                                           | S3      |
| 2. | Preparation of the E-gel( $x$ )                                                                            | S4      |
| 3. | Characterization of gels (Solid-state $^1\text{H}$ FGMAS NMR, FT-IR spectra)                               | S5-S6   |
| 4. | Dependency of rupture strength of E-gel(10)Az-gel(10) on reaction time                                     | S7      |
| 5. | Rupture strength of E-gel( $x$ ) and Az-gel( $x$ )                                                         | S8      |
| 6. | Preparation of the Az-Sub and the E-Sub                                                                    | S9-S10  |
| 7. | Characterization of the Az-Sub and the E-Sub (Contact angles, ATR-FT-IR, X-ray photoelectron spectroscopy) | S11-S13 |

## 1. Preparation of Az-gel(x)

Typical procedure for Az-gel(10). AAm (188 mg, 2.6 mmol), AA (20.6  $\mu$ L, 0.30 mmol), MBAAm (19 mg, 0.12 mmol) and AIBN (2.5 mg, 0.015 mmol) were dissolved in DMSO (1.5 mL). The solution was purged with argon gas for 1 hour and was then heated at 70 °C overnight to form a gel. The gel was soaked in 4 mL DMSO solution containing *N*-(2-aminoethyl)-4-azidobenzamide (185 mg, 0.90 mmol), BOP reagent (400 mg, 0.90 mmol) and Et<sub>3</sub>N (124  $\mu$ L, 0.90 mmol) and shaken for 48 hours at 25 °C. After the reaction, the gel was washed repeatedly with DMSO, followed by water. The gel was soaked in water and used as hydrogels.

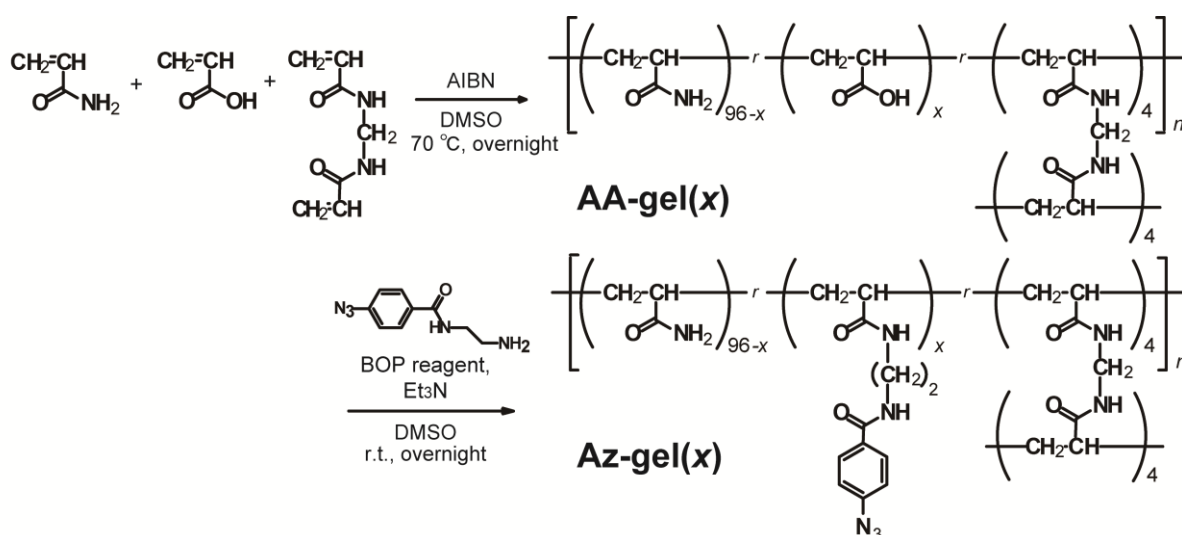

**Scheme S1.** Preparation of the Az-gel(x).

## 2. Preparation of E-gel(x)

Typical procedure for E-gel(10). AAm (188 mg, 2.6 mmol), AA (20.6  $\mu$ L, 0.30 mmol), MBAAm (19 mg, 0.12 mmol) and AIBN (2.5 mg, 0.015 mmol) were dissolved in DMSO (1.5 mL). The solution was purged with argon gas for 1 hour and was then heated at 70  $^{\circ}$ C overnight to form a gel. The gel was soaked in 4 mL DMSO solution containing propargylamine (34  $\mu$ L, 0.90 mmol), BOP reagent (400 mg, 0.90 mmol) and Et<sub>3</sub>N (124  $\mu$ L, 0.90 mmol) and shaken for 48 hours at 25  $^{\circ}$ C. After the reaction, the gel was washed repeatedly with DMSO, followed by water, respectively. The gel was soaked in water and used as hydrogels.

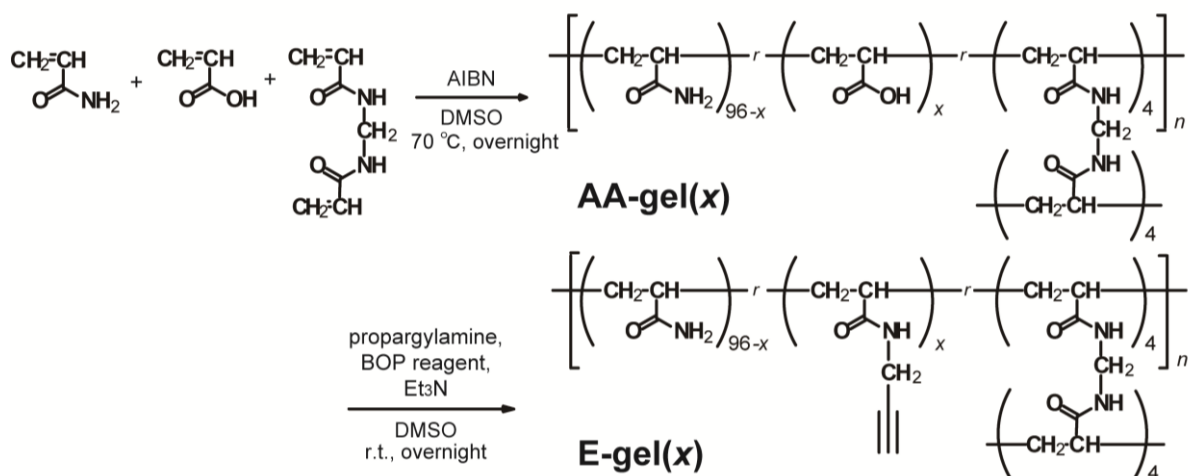

**Scheme S2.** Preparation of the E-gel(x).

**Table S1.** Preparation of the AA-gel(x) varying the mol% of the AA unit.

| AA-gel(x)  | AA     |       | AAm    |       | MBAAm  | AIBN   |
|------------|--------|-------|--------|-------|--------|--------|
|            | / mmol | /mol% | / mmol | /mol% | / mmol | / mmol |
| AA-gel(2)  | 0.06   | 2     | 2.9    | 96    | 0.06   | 0.015  |
| AA-gel(5)  | 0.15   | 5     | 2.8    | 93    | 0.06   | 0.015  |
| AA-gel(7)  | 0.21   | 7     | 2.7    | 91    | 0.06   | 0.015  |
| AA-gel(10) | 0.30   | 10    | 2.6    | 88    | 0.06   | 0.015  |
| AA-gel(12) | 0.36   | 12    | 2.6    | 86    | 0.06   | 0.015  |

### 3. Characterization of gels (Solid-state $^1\text{H}$ FGMAS NMR, FT-IR spectra)

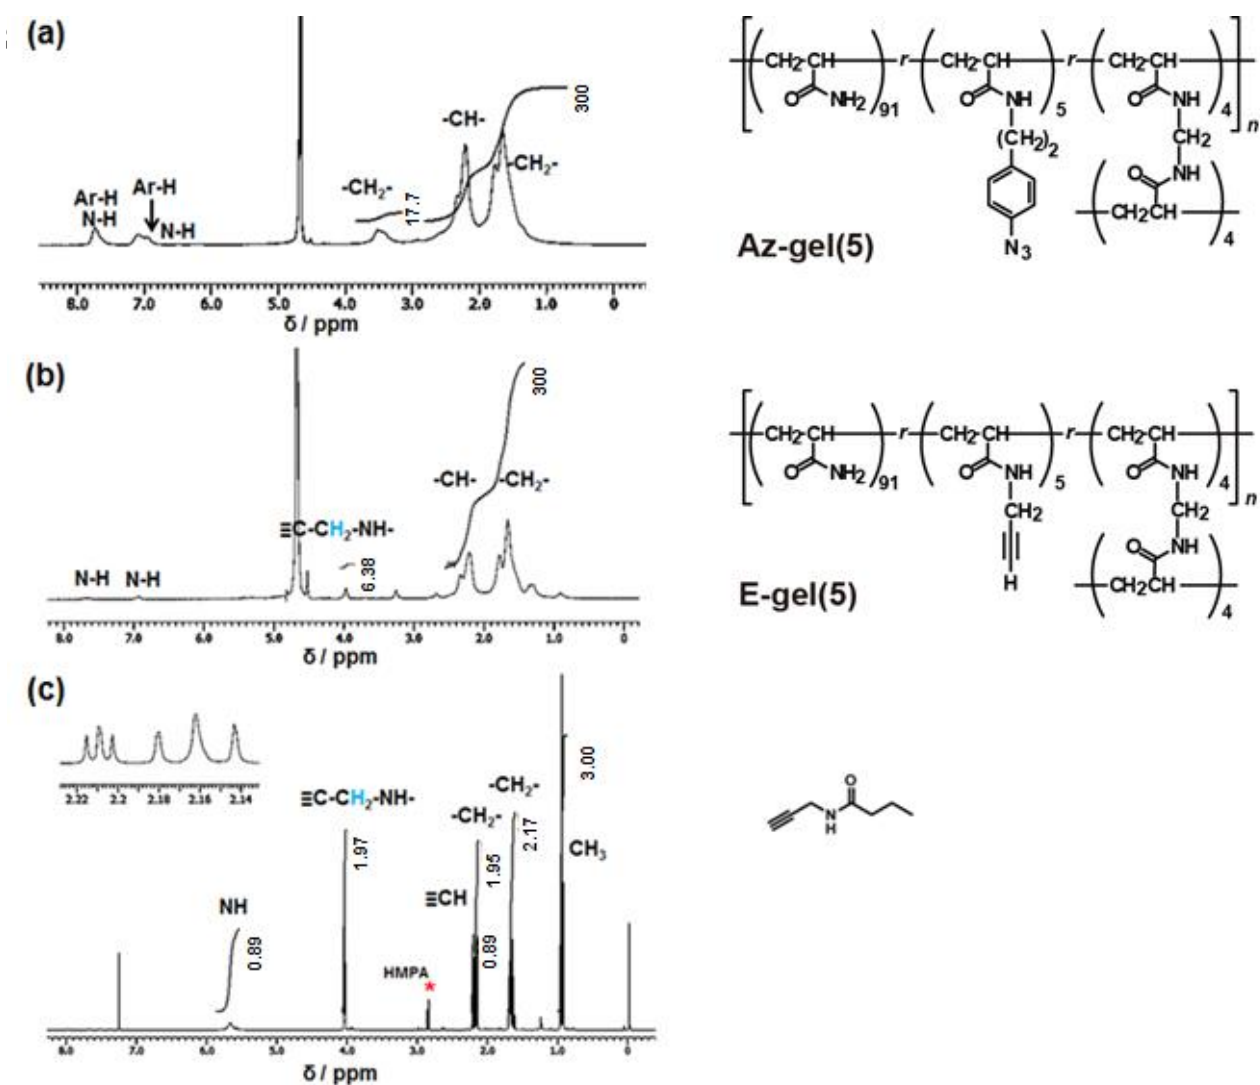

**Figure S1.**  $^1\text{H}$  solid state field gradient magic angle spinning nuclear magnetic resonance ( $^1\text{H}$  FGMAS NMR) spectra of (a) Az-gel(5), (b) E-gel(5), and  $^1\text{H}$  NMR spectra of (c)  $N$ -(prop-2-yn-1-yl)butyramide. Az-gel(5) and E-gel(5) : immersed in  $\text{D}_2\text{O}$ , 400 MHz, 30 °C, rotation frequency = 7 kHz.  $N$ -(prop-2-yn-1-yl)butyramide : solved in  $\text{CDCl}_3$ , 400 MHz, 30 °C.

## FT-IR spectra

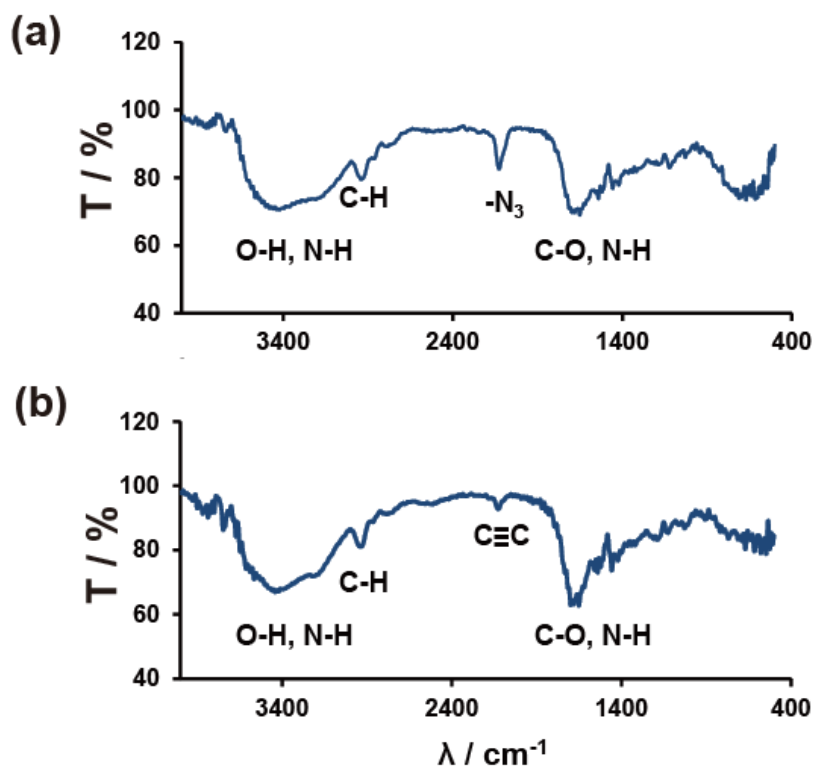

**Figure S2.** FT-IR spectra of (a) Az-gel(10) and (b) E-gel(10). %T represents transmittance percentage. (KBr disc, r.t.)

**Az-gel(10):** 3436, 3185  $\text{cm}^{-1}$  (O-H stretching vibration, N-H asymmetric stretching vibration, and N-H symmetric stretching vibration), 2933, 2857  $\text{cm}^{-1}$  (methylene C-H stretching vibration), 2121  $\text{cm}^{-1}$  ( $-\text{N}_3$  asymmetric stretching vibration), and 1697  $\text{cm}^{-1}$  (C=O stretching vibration, N-H bending vibration).

**E-gel(10):** 3430, 3208  $\text{cm}^{-1}$  (O-H stretching vibration, N-H asymmetric stretching vibration, and N-H symmetric stretching vibration), 2927, 2861  $\text{cm}^{-1}$  (methylene C-H stretching vibration), 2119  $\text{cm}^{-1}$  ( $\text{C}\equiv\text{C}$  stretching vibration), 1698  $\text{cm}^{-1}$  (C=O stretching vibration, N-H bending vibration).

#### 4. Dependency of rupture strength of the E-gel(10)/Az-gel(10) on reaction time

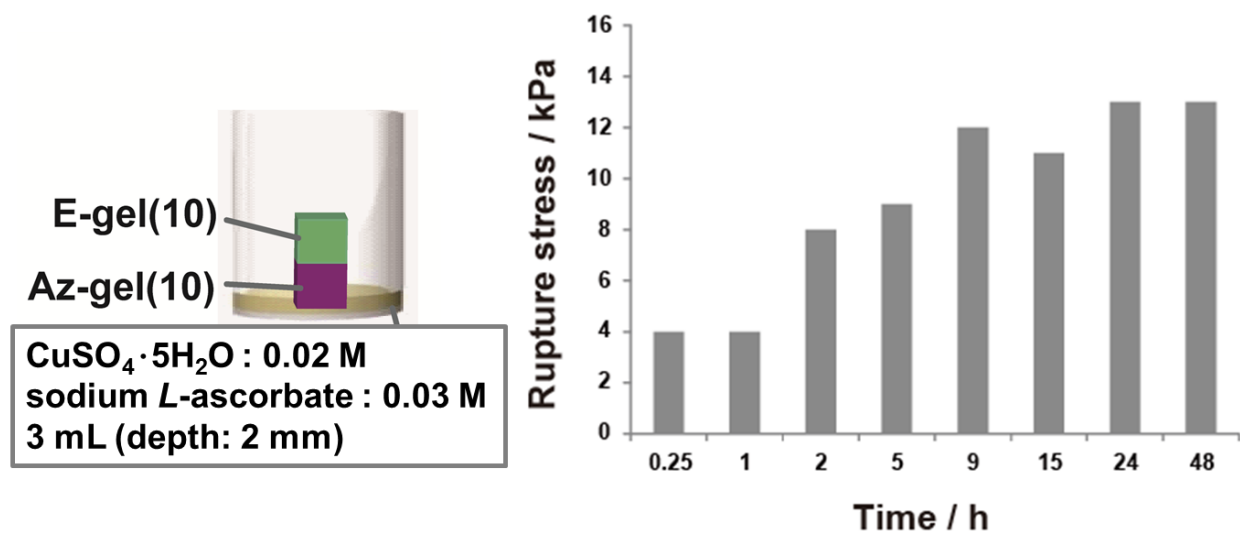

**Figure S3.** Dependency of rupture stress values of E-gel(10)/Az-gel(10) on reaction time of the CuAAC reaction. See the main text for reaction conditions.

## 5. Rupture strength of E-gel( $x$ ) and Az-gel( $x$ )

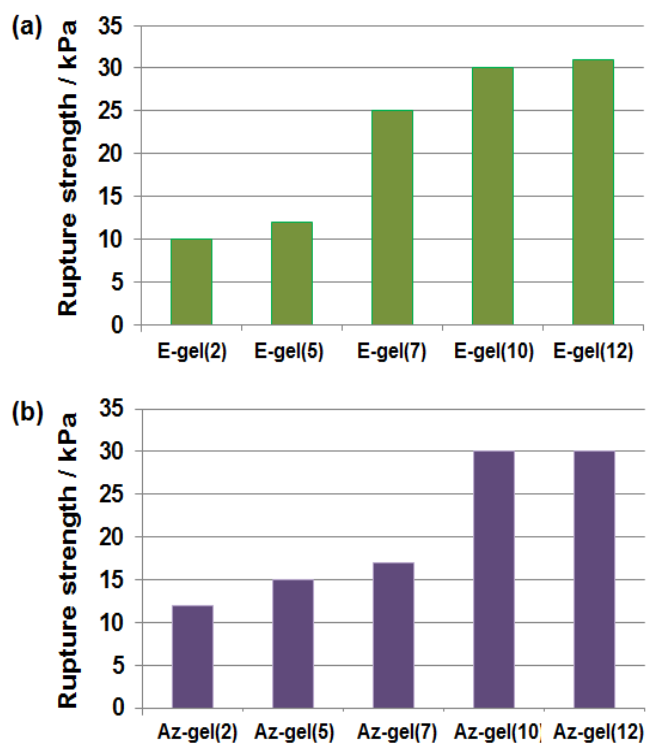

**Figure S4.** Rupture strength of E-gel( $x$ ) (a) and Az-gel( $x$ ) (b).  $x$  denotes the mol% of the functional groups (E group or Az group).



## 6. Preparation of Az-Sub and E-Sub.

### Preparation of Az-Sub.

Glass plates (MATSUNAMI No. S1126, 76 mm×26 mm×1.0 mm) were cut into 26 mm×26 mm×1.0 mm pieces. 8 plates of the glass were ultrasonicated in acetone, and methanol for 15 min, respectively, and subsequently dried. The substrates were cleaned with a O<sub>3</sub>/UV cleaner (Filgen UV253S) for 12 hours to create a hydrophilic surface. The cleaned substrates were immersed in a toluene solution (70 mL) of 3-aminopropyltriethoxysilane (APTES) (1.6 mL, 6.8 mmol) at 70 °C and shaken for 3 hours. These substrates were washed 4 times with toluene, and immersed in a DMSO solution (70 mL) with 4-azidobenzoic acid (570 mg, 3.5 mmol), BOP reagent (1.86 g, 4.2 mmol) and Et<sub>3</sub>N (0.6 mL, 4.3 mmol) at 45 °C for two days. Each substrate was washed with DMSO and water repeatedly.

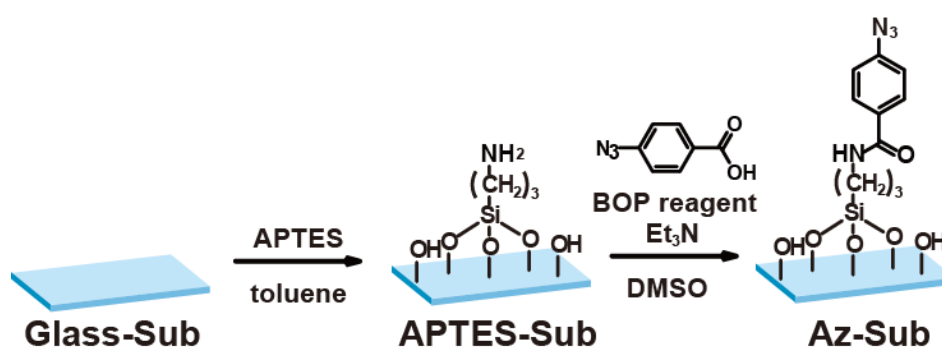

**Scheme S3.** Preparation of the Az-Sub.

### Preparation of E-Sub.

Glass plates were cut into 26 mm×26 mm×1.0 mm pieces. 8 plates of the glass were ultrasonicated in acetone, and methanol for 15 min, respectively, and subsequently dried. The substrates were cleaned with a O<sub>3</sub>/UV cleaner for 12 hours to create a hydrophilic surface. The cleaned substrates were immersed in a toluene solution (70 mL) of 3-

glycidyoxypropyltrimethoxysilane (GOPTS) (1.6 mL, 6.8 mmol) at 70 °C and shaken for 3 hours. These substrates were washed 4 times with toluene, and immersed in a DMSO solution (70 mL) with propargyl amine (223  $\mu$ L, 3.5 mmol) for two days at room temperature. Each substrate was washed with DMSO and water repeatedly.

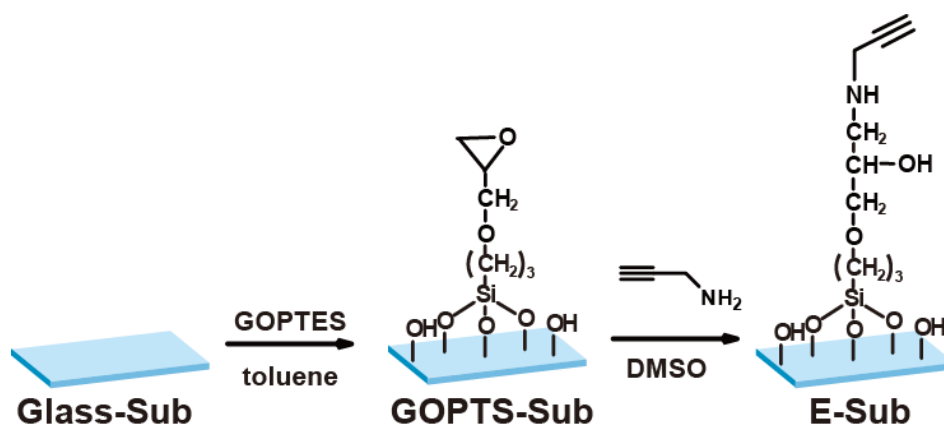

**Scheme S4.** Preparation of the E-Sub.

## 7. Characterization of Az-Sub and E-Sub (Contact angles, ATR-FT-IR, X-ray photoelectron spectroscopy)

### Contact angles.

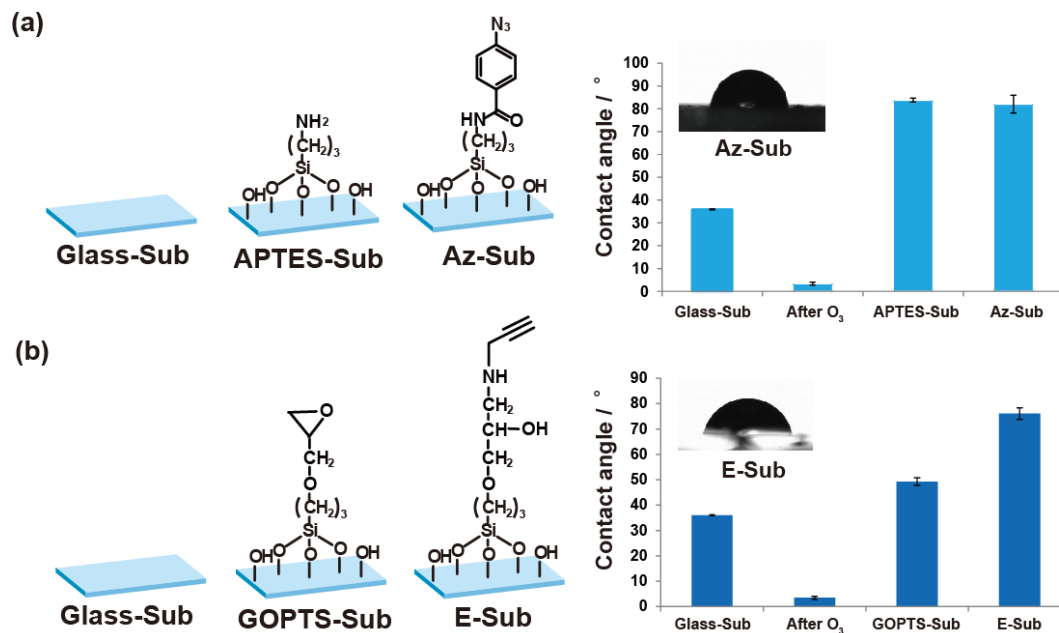

**Figure S5.** The values of contact angle. (a) Glass-Sub, Glass-Sub after treating with O<sub>3</sub>/UV, APTES-Sub and Az-Sub. (b) Glass-Sub, Glass-Sub after treating with O<sub>3</sub>/UV, GOPTS-Sub and E-Sub. The error bars were standard deviations of three samples.

## ATR-FT-IR

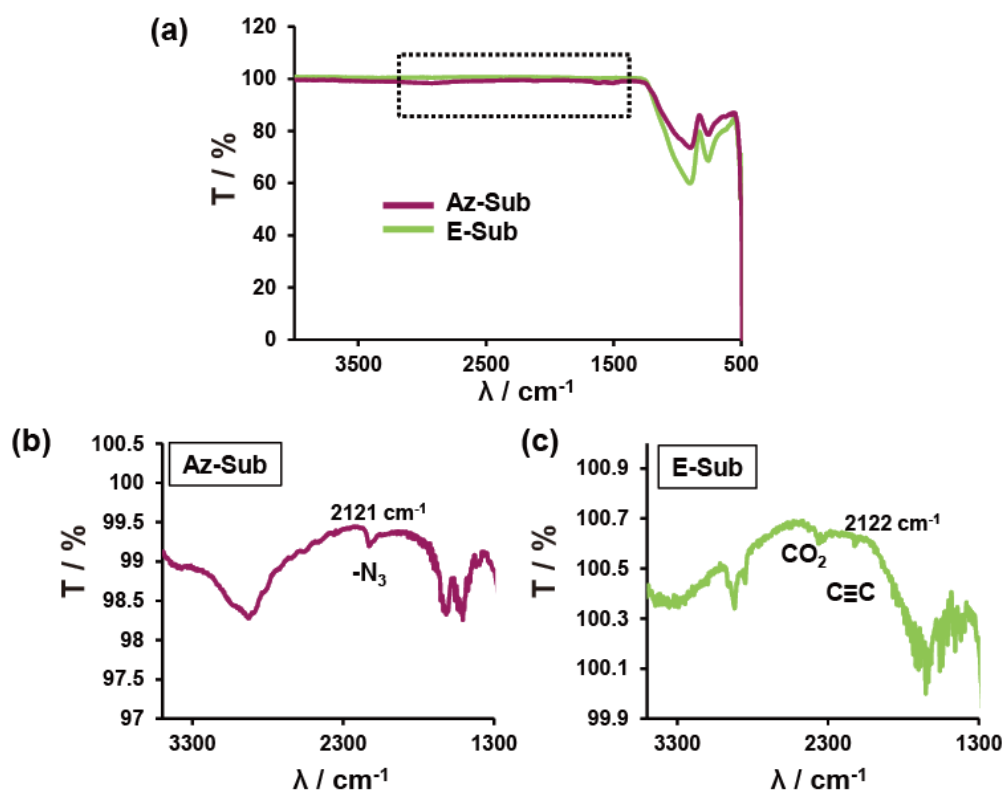

**Figure S6.** Attenuated total reflection Fourier transform infrared spectroscopy (ATR-FT-IR) of (a) the Az-Sub (purple) and the E-Sub (green). (b) and (c) show the high-resolution spectra around 3500 – 1300  $\text{cm}^{-1}$  of the Az-Sub (b) and the E-Sub (c).

## X-ray photoelectron spectroscopy (XPS)

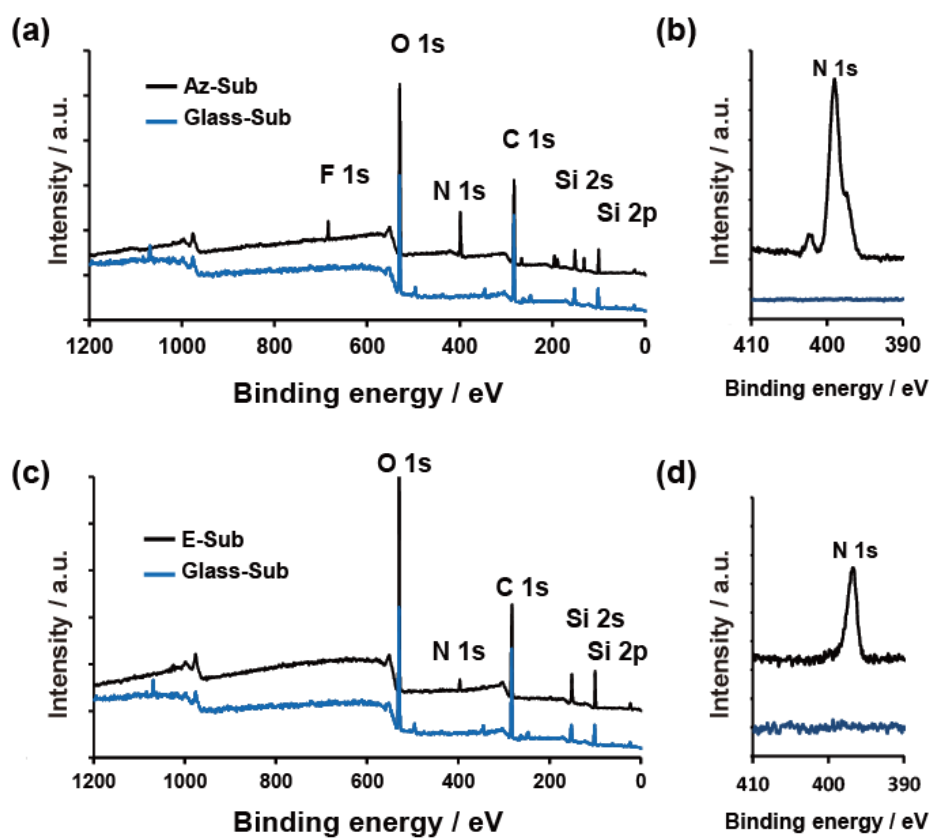

**Figure S7.** X-ray photoelectron spectroscopy (XPS) spectra of the Az-Sub ((a), (b)) and the E-Sub ((c), (d)). (a) and (c) show the wide range spectra of the Az-Sub and the E-Sub, respectively. (b) and (d) show the high-resolution spectra around 390 - 410 eV.
